# Supplementary material for: Next-Generation Sequencing Analysis and Algorithms for PDX and CDX Models
Source: Oxford University Press journal article supplement (doi:10.1158/1541-7786.mcr-16-0431), 2017-04-25
Supplement: 15417786mcr160431-sup-175363_3_supp_3979404_jjcrgd.pdf [file 15417786mcr160431-sup-175363_3_supp_3979404_jjcrgd.pdf]

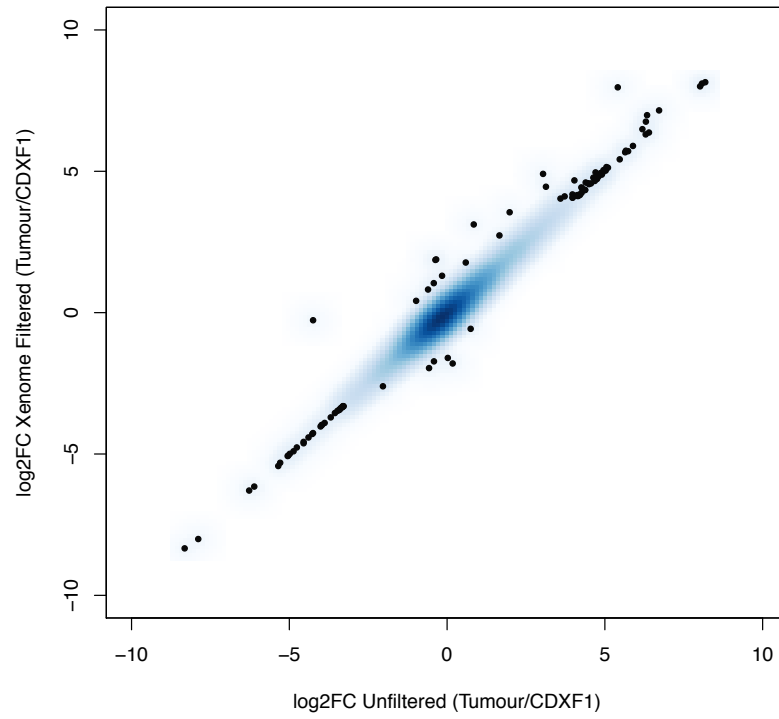

**Supplementary Figure 3.** Correspondence in fold changes between human primary and CDX model before and after using Xenome. Loci no longer detected following filtering have been removed from the figure.
